# Supplementary material
Source: Springer Nature journal article supplement (https://www.springermedizin.de/resource/supplementary/12881_2014_1228_MOESM4_ESM.pdf/9452204)

Figure S2

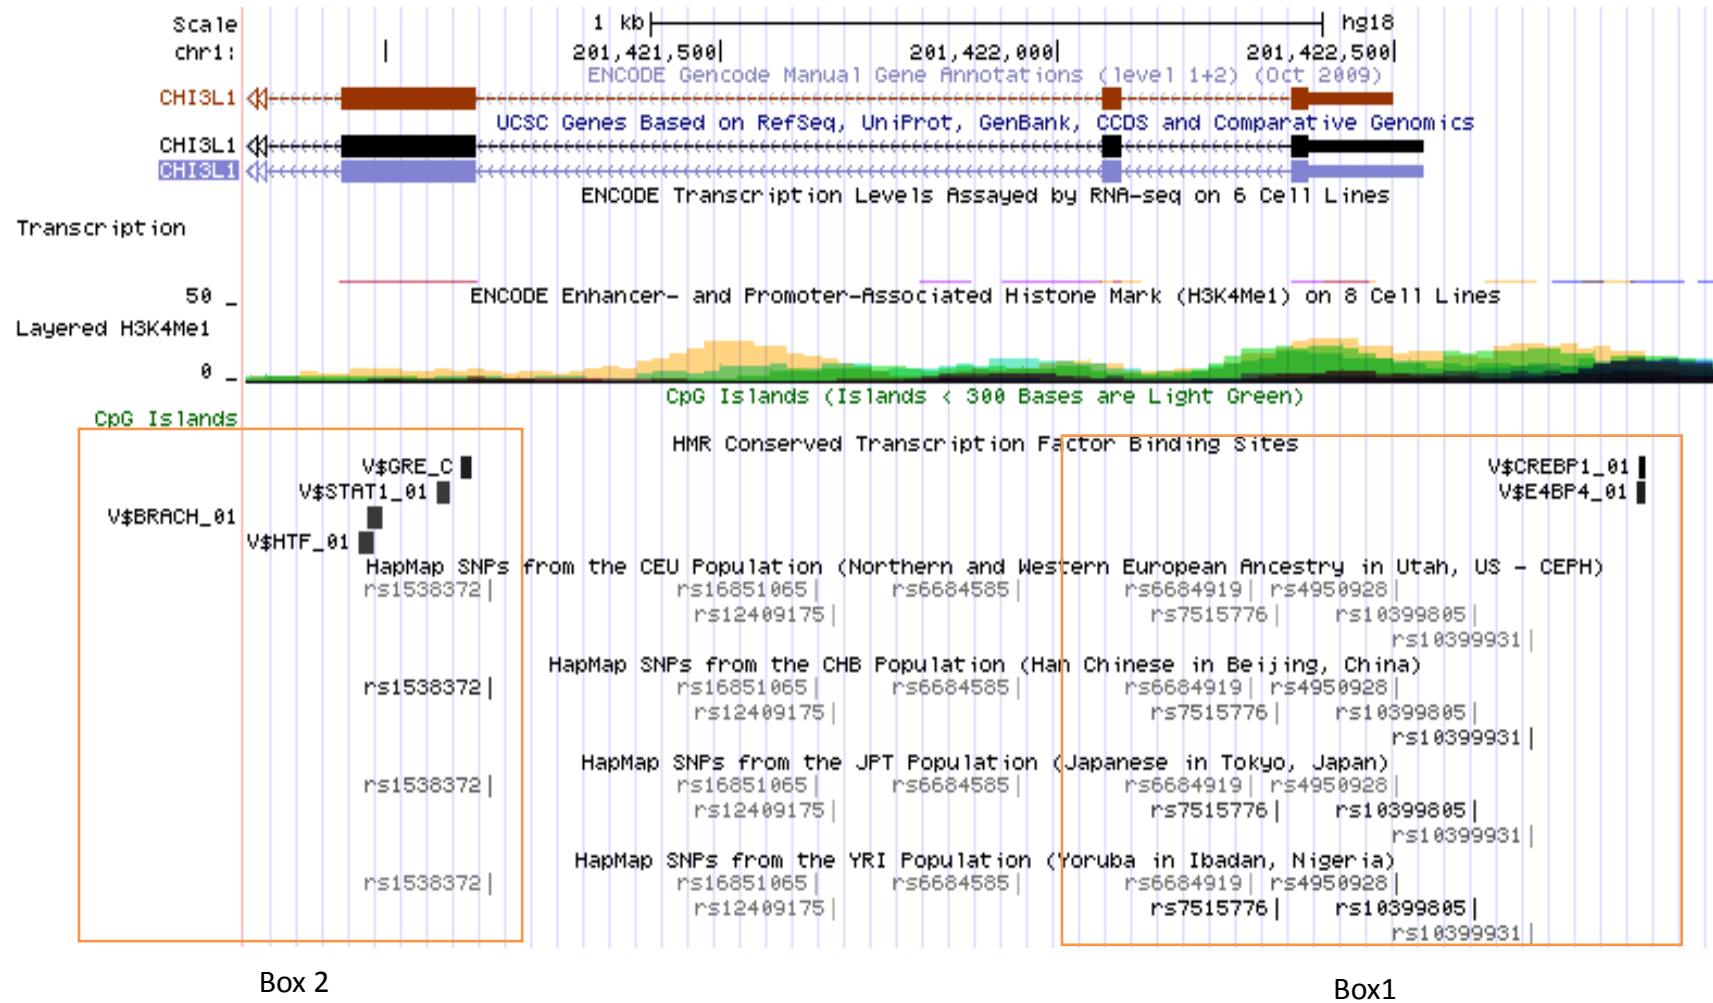

Supplement: MOESM4 [file 9452204]
